# Supplementary material
Source: PubMed Central journal article supplement (PMC3708170)
Supplement: supp_M112.026708_mcp.M112.026708-1.pdf [file supp_M112.026708_mcp.M112.026708-1.pdf]

**Supplemental Table S1.**

Elution time, and experimental and theoretical monoisotopic mass values of tryptic fragments of cystatin C and its sulfoxide derivative. The identification, based on the experimental mass values, was also confirmed by high resolution HPLC-ESI-MS/MS sequencing.

| El. Time (min) | Exper. Mass (Da) [M+H] <sup>+</sup> | Theor. Mass (Da) [M+H] <sup>+</sup> | a.a. residues | MS/MS Sequencing  |
|----------------|-------------------------------------|-------------------------------------|---------------|-------------------|
| 19.2-19.9      | 2451.09 ± 0.1                       | 2451.23                             | 1-24          | nd                |
| 18.6-19.4      | 2467.08 ± 0.1                       | 2467.23                             | 1-24 ox       | nd                |
| 20.4-21.1      | 1644.79 ± 0.01                      | 1644.79                             | 9-24          | LVGGPMDASVEEEGVR  |
| 17.7-18.2      | 1660.79 ± 0.01                      | 1660.79                             | 9-24 ox       | LVGGPmDASVEEEGVR  |
| 20.2-20.9      | 1800.90 ± 0.02                      | 1800.89                             | 9-25          | nd                |
| 22.4-22.9      | 1226.61 ± 0.01                      | 1226.61                             | 26-36         | ALDFAVGEYNK       |
| 31.2-31.8      | 2288.09 ± 0.05                      | 2288.04                             | 26-45         | nd                |
| 30.3-30.9      | 1921.06 ± 0.02                      | 1921.05                             | 54-70         | KQIVAGVNYFLDVELGR |
| 31.6-32.1      | 1792.96 ± 0.02                      | 1792.96                             | 55-70         | QIVAGVNYFLDVELGR  |

“m” = oxidized methionine; nd = not determined.
