# Supplementary material
Source: PubMed Central journal article supplement (PMC3708170)
Supplement: supp_M112.026708_mcp.M112.026708-2.pdf [file supp_M112.026708_mcp.M112.026708-2.pdf]

**Supplemental Table S2.** m/z values of the multiply-charged ions used for the XIC quantification of the peptides/proteins analyzed in the study.

| Protein/peptide                      | m/z values of multiply-charged ions used to extract ion current peaks (charge in parenthesis)                                                                           |
|--------------------------------------|-------------------------------------------------------------------------------------------------------------------------------------------------------------------------|
| PRP-1 type 2P (P02810)               | 1293.9 (+12), 1194.4 (+13), 1035.3 (+15), 970.7 (+16), 913.6 (+17).                                                                                                     |
| PRP-3 type 2P (P02810)               | 1595.5 (+7), 1396.2 (+8), 1015.7 (+11), 931.1 (+12), 859.6 (+13).                                                                                                       |
| P-C peptide (P02810)                 | 1457.9 (+3), 1093.7 (+4).                                                                                                                                               |
| Histatin 1 (P15515)                  | 1644.1 (+3), 1233.5 (+4).                                                                                                                                               |
| Histatin 3 (P15516)                  | 1355.1 (+3), 1016.6 (+4).                                                                                                                                               |
| Histatin 5 (P15516)                  | 1013.2 (+3), 760.1 (+4).                                                                                                                                                |
| Histatin 6 (P15516)                  | 1065.1 (+3), 799.1 (+4).                                                                                                                                                |
| Cystatin S nonP (P01036)             | 1774.3 (+8), 1577.2 (+9), 1419.6 (+10), 1290.6 (+11), 1183.2 (+12), 1092.2 (+13), 1014.3 (+14).                                                                         |
| Cystatin S 1P (S1)                   | 1784.3 (+8), 1586.1 (+9), 1427.6 (+10), 1297.9 (+11), 1189.8 (+12), 1098.4 (+13), 1020.0 (+14).                                                                         |
| Cystatin S 2P (S2)                   | 1794.3 (+8), 1595.0 (+9), 1435.6 (+10), 1305.2 (+11), 1196.5 (+12), 1104.5 (+13), 1025.7 (+14).                                                                         |
| Cystatin SN (P01037)                 | 1790.0 (+8), 1591.2 (+9), 1432.2 (+10), 1302.1 (+11), 1193.7 (+12), 1101.9 (+13), 1023.3 (+14).                                                                         |
| Cystatin SA (P09228)                 | 1794.4 (+8), 1595.1 (+9), 1435.7 (+10), 1305.3 (+11), 1196.6 (+12), 1104.6 (+13), 1025.8 (+14).                                                                         |
| Cystatin B dimeric form (P04080)     | 1864.4 (12+), 1721.1 (13+), 1598.2 (14+), 1491.8 (15+), 1398.6 (16+), 1316.4 (17+), 1243.3 (18+), 1177.9 (19+), 1119.0 (20+), 1065.8, (21+), 1017.4 (22+), 973.2 (23+). |
| Cystatin B glutathionylated          | 1915.5 (6+), 1642.0 (7+), 1436.9 (8+), 1277.3 (9+), 1149.7 (10+), 1045.3 (11+).                                                                                         |
| Cystatin C (P01034)                  | 1668.9 (+8), 1483.6 (+9), 1335.3 (+10), 1214.0 (+11), 1112.9 (+12), 1027.4 (+13), 954.1 (+14)                                                                           |
| Cystatin C methionine sulfoxide      | 1670.8 (+8), 1485.2 (+9), 1336.8 (+10), 1215.4 (+11), 1114.2 (+12), 1028.6 (+13), 955.2 (+14)                                                                           |
| Statherin 2P (P02808)                | 1794.2 (+3), 1345.9 (+4), 1076.9 (+5).                                                                                                                                  |
| P-B (P02814)                         | 1932.0 (+3), 1449.2 (+4), 1159.6 (+5).                                                                                                                                  |
| Thymosin $\beta_4$ (P62328)          | 1655.5 (+3), 1241.9 (+4), 993.8 (+5).                                                                                                                                   |
| $\alpha$ -defensin 1 (P59665)        | 1722.1 (+2), 1148.4 (+3), 861.5 (+4).                                                                                                                                   |
| $\alpha$ -defensin 2 (P59665/P59666) | 1686.5 (+2), 1124.7 (+3), 843.8 (+4).                                                                                                                                   |
| $\alpha$ -defensin 3 (P59666)        | 1744.1 (+2), 1163.0 (+3), 872.5 (+4).                                                                                                                                   |
| S100A7 (D27) (P31151)                | 1422.0 (+8), 1264.1 (+9), 1137.8 (+10), 1034.4 (+11).                                                                                                                   |
| S100A8 (P05109)                      | 1355.3 (+8), 1204.8 (+9), 1084.5 (+10), 986.0 (+11).                                                                                                                    |

| Protein/peptide                      | m/z values of multiply-charged ions used to extract ion current peaks (charge in parenthesis) |
|--------------------------------------|-----------------------------------------------------------------------------------------------|
| S100A9 short 1P (P06702)             | 1419.8 (+9), 1277.9 (+10), 1161.8 (+11), 1065.1 (+12), 983.3(+13).                            |
| S100A9 short 1P methionine sulfoxide | 1421.6 (+9), 1279.5 (+10), 1163.3 (+11), 1066.4 (+12), 984.5 (+13).                           |
| S100A9 short                         | 1410.9 (+9), 1269.9 (+10), 1154.6 (+11), 1058.4 (+12), 977.1 (+13).                           |
| S100A9 short methionine sulfoxide    | 1412.7 (+9), 1271.5 (+10), 1156.0 (+11), 1059.8 (+12), 978.3 (+13).                           |
| S100A9 long glutathionylated         | 1346.8 (+10), 1224.5 (+11), 1122.5 (+12), 1036.2 (+13), 962.3 (+14).                          |
| S100A12 (P80511)                     | 1306.5 (+8), 1161.4 (+9), 1045.4 (+10), 950.4 (+11).                                          |
